# Supplementary material
Source: PubMed Central journal article supplement (PMC3873489)

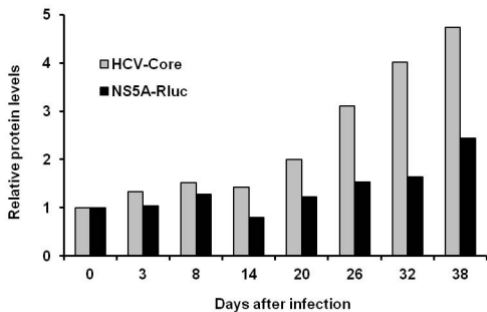

Figure S1

Supplement: mmc1.pdf [file mmc1.pdf]

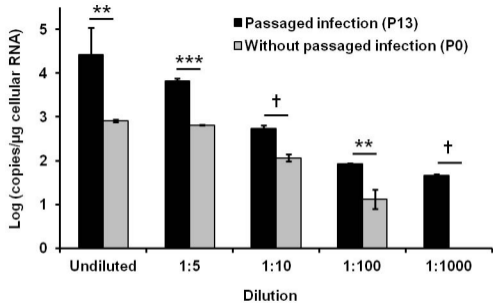

Figure S2

Supplement: mmc2.pdf [file mmc2.pdf]

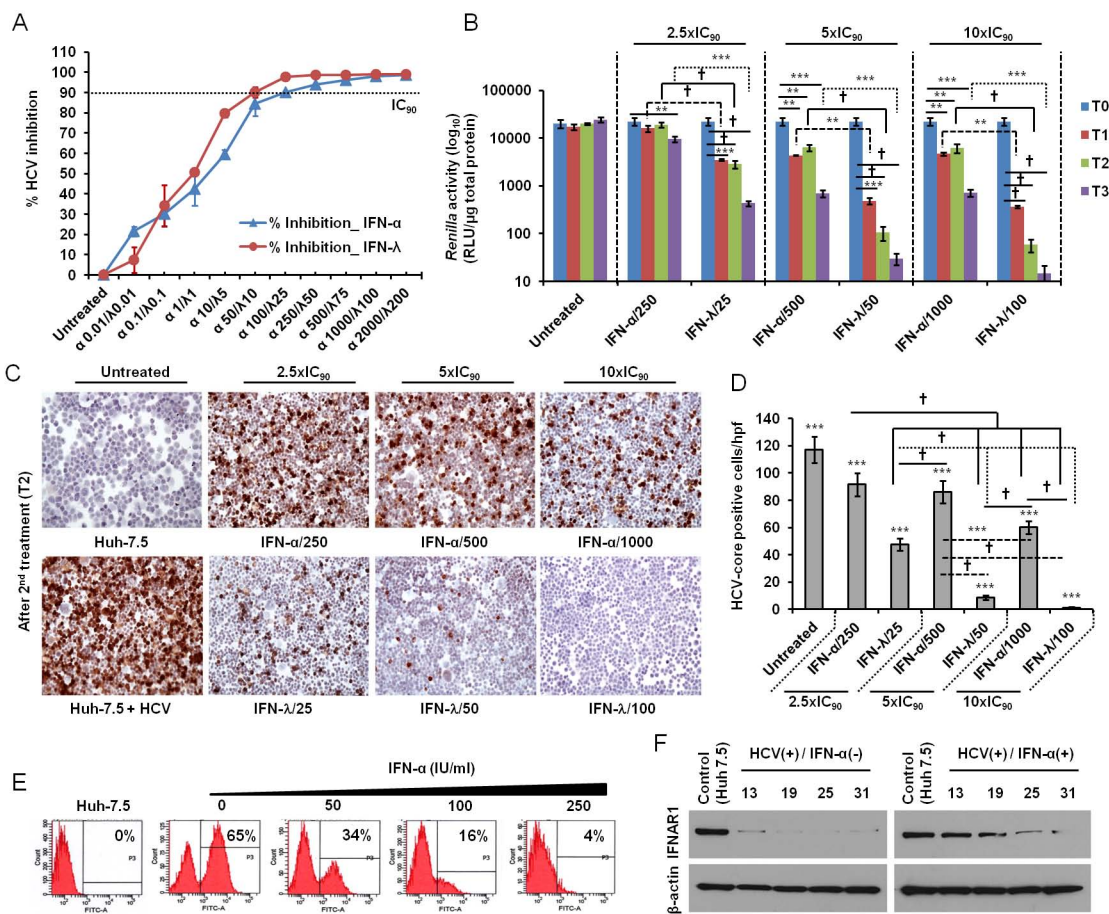

Figure S3

Supplement: mmc3.pdf [file mmc3.pdf]

A

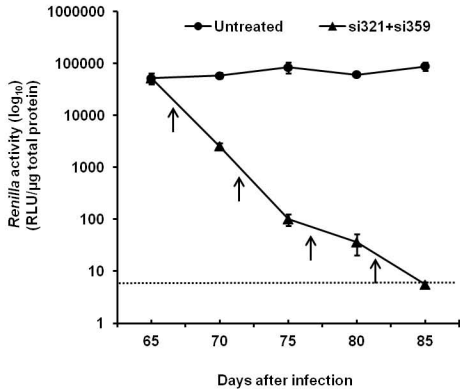

B

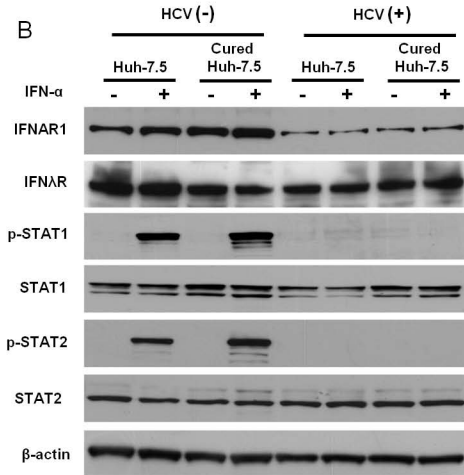

Figure S4

Supplement: mmc4.pdf [file mmc4.pdf]

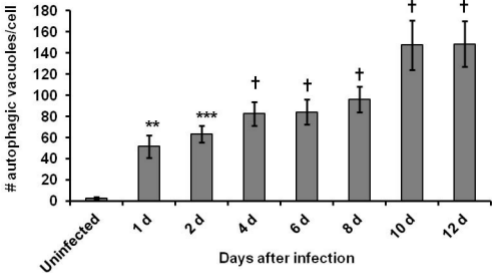

Figure S5

Supplement: mmc5.pdf [file mmc5.pdf]

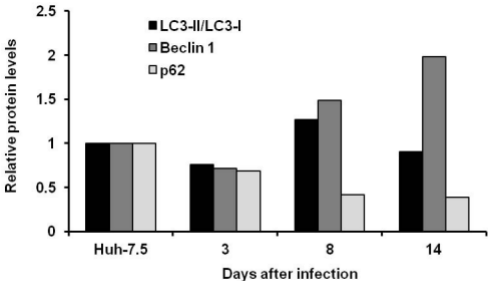

Figure S6

Supplement: mmc6.pdf [file mmc6.pdf]
